# Supplementary material for: ZIF-L-derived FeN–hcC catalysts with curved carbon surfaces for effective oxygen reduction reaction over the entire pH range
Source: Royal Society of Chemistry journal article supplement (doi:10.1039/d4nj04093g), 2024-01-01
Supplement: d4nj04093g1.pdf [file d4nj04093g1.pdf]

# Supporting Information

## **ZIF-L-derived Fe-N<sub>hc</sub>C Catalysts with Curved Carbon Surfaces for Effective for Oxygen Reduction over the Entire pH Range**

Xu Dai <sup>a</sup> and Zhenlu Zhao <sup>a, b\*</sup>

<sup>a</sup> *School of Material Science and Engineering, University of Jinan, Jinan 250022, Shandong, China.*

<sup>b</sup> *State Key Lab of Electroanalytical Chemistry, Changchun Institute of Applied Chemistry, Chinese Academy of Sciences, Changchun 130022, Jilin, China*

*E-mail: [mse\\_zhaozl@ujn.edu.cn](mailto:mse_zhaozl@ujn.edu.cn)*

## Materials and chemicals

Ferric citrate, Zinc nitrate hexahydrate [ $\text{Zn}(\text{NO}_3)_2 \cdot 6\text{H}_2\text{O}$ ] and 2-Methylimidazole (98%) were purchased from Sigma-Aldrich. Triblock copolymers poly (ethylene oxide)-b-poly (propylene oxide)-b-poly (ethylene oxide) Pluronic<sup>®</sup>P123 ( $\text{PEO}_{20}\text{PPO}_{70}\text{PEO}_{20}$ ,  $M_w = 5800$ ) and Pt/C (20wt%) were purchased from Shang Hai Maclean Biochemical Co. Nafion<sup>®</sup> solution (5 wt%) was purchased from Energy Chemical. The deionized water was made by the laboratory water purifier (18.3 M $\Omega$  cm). All the chemicals used in the synthesis of catalysts were analytical purity and no further purification was made.

### 1. Characterizations

The morphology and size of the catalysts were characterized by field emission scanning electron microscopy (SEM, Gemini300) and high-resolution transmission electron microscopy (HR-TEM, JEOL JEM-F200). Further surface characterization of the catalysts was measured by atomic force microscopy AFM (Bruker Dimension ICON). The crystal structure information was obtained by X-ray diffraction (XRD, Japan Rigaku Smart Lab SE) with Cu K $\alpha$  radiation ( $\lambda = 0.15$  nm) in the  $2\theta$  range from  $5^\circ$  to  $80^\circ$ . The composition, chemical state, and molecular structure of elements on the surface of the sample were obtained by X-ray photoelectron spectroscopy (XPS, Thermo Scientific ESCALAB Xi<sup>+</sup>). The degree of disorder and graphitization of the sample carbon were measured using a 532 nm laser as the excitation source using a Raman spectrometer (HR Evolution). Nitrogen adsorption-desorption measurements on MAC TriStar II 3flex. The pore size distribution and specific surface area of the sample were determined by Brunauer-Emmett-Teller (BET) method. The specific element content was determined by an inductively coupled plasma spectrum/mass spectrometer (Agilent 5110(OES)).

### 2. Electrochemical measurements

All ORR electrochemical measurements were performed on the CHI 760E electrochemical workstation via a three-electrode cell with a Hg/HgO as a reference electrode, a graphite rod as a counter electrode, and an electrocatalyst-coated rotating

disk electrode as a working electrode. A uniform electrocatalyst ink was prepared by ultrasonically dispersing 5.0 mg electrocatalyst powder in a mixed solution containing 1ml ethanol and 2 $\mu$ L Nafion for 1h. Cyclic voltammetry curves (CV) and linear sweep voltammetry curves (LSV) are obtained at a sweep rate of 10 mV s<sup>-1</sup> and 2 mV s<sup>-1</sup> over a potential range of 0 to 1.2 V. Long-term stability and CH<sub>3</sub>OH (1 M) toxicity tests were performed by measuring current-time (I-t) chrono current response at 0.7 V and 1600 rpm. To further calculate the electron transfer number (n), the Koutecky-Levich (K-L) equation is as follows:

$$J^{-1} = J_k^{-1} + B^{-1} \omega^{-\frac{1}{2}}$$

$$B = 0.2nFC_0D_0^{\frac{2}{3}}V^{-\frac{1}{6}}$$

where J and J<sub>k</sub> are the measured and kinetic current densities, respectively,  $\omega$  is the rotating speed, n is the electron transfer number, F is the Faraday constant (96,485 C mol<sup>-1</sup>), C<sub>0</sub> is the bulk concentration of oxygen (1.2 $\times$ 10<sup>-6</sup> mol cm<sup>-3</sup>), D<sub>0</sub> is the diffusion coefficient of oxygen (1.9 $\times$ 10<sup>-5</sup> cm<sup>2</sup> s<sup>-1</sup>), and V is the kinematic viscosity of the electrolyte (0.01 cm<sup>2</sup> s<sup>-1</sup>).

The electron transfer number (n) and yield of peroxide can be evaluated from the LSV curve of RRDE measurement at 1600 rpm according to the following equation:

$$n = \frac{4 \times I_D}{I_D + I_R/N}$$

$$H_2O_2(\%) = 200 \frac{I_R/N}{I_D + (I_R/N)}$$

where I<sub>D</sub> represents disk current and I<sub>R</sub> represents ring current at 1.23 V vs RHE. N = 0.37 is the current collection efficiency of the ring electrode.

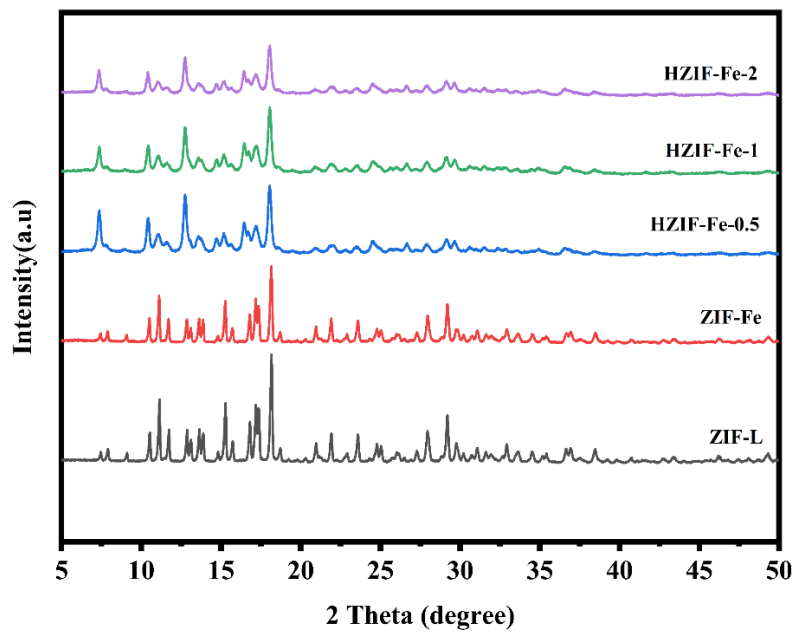

**Figure. S1.** XRD patterns of ZIF-L, ZIF-Fe, HZIF-Fe-0.5, HZIF-Fe-1, HZIF-Fe-2.

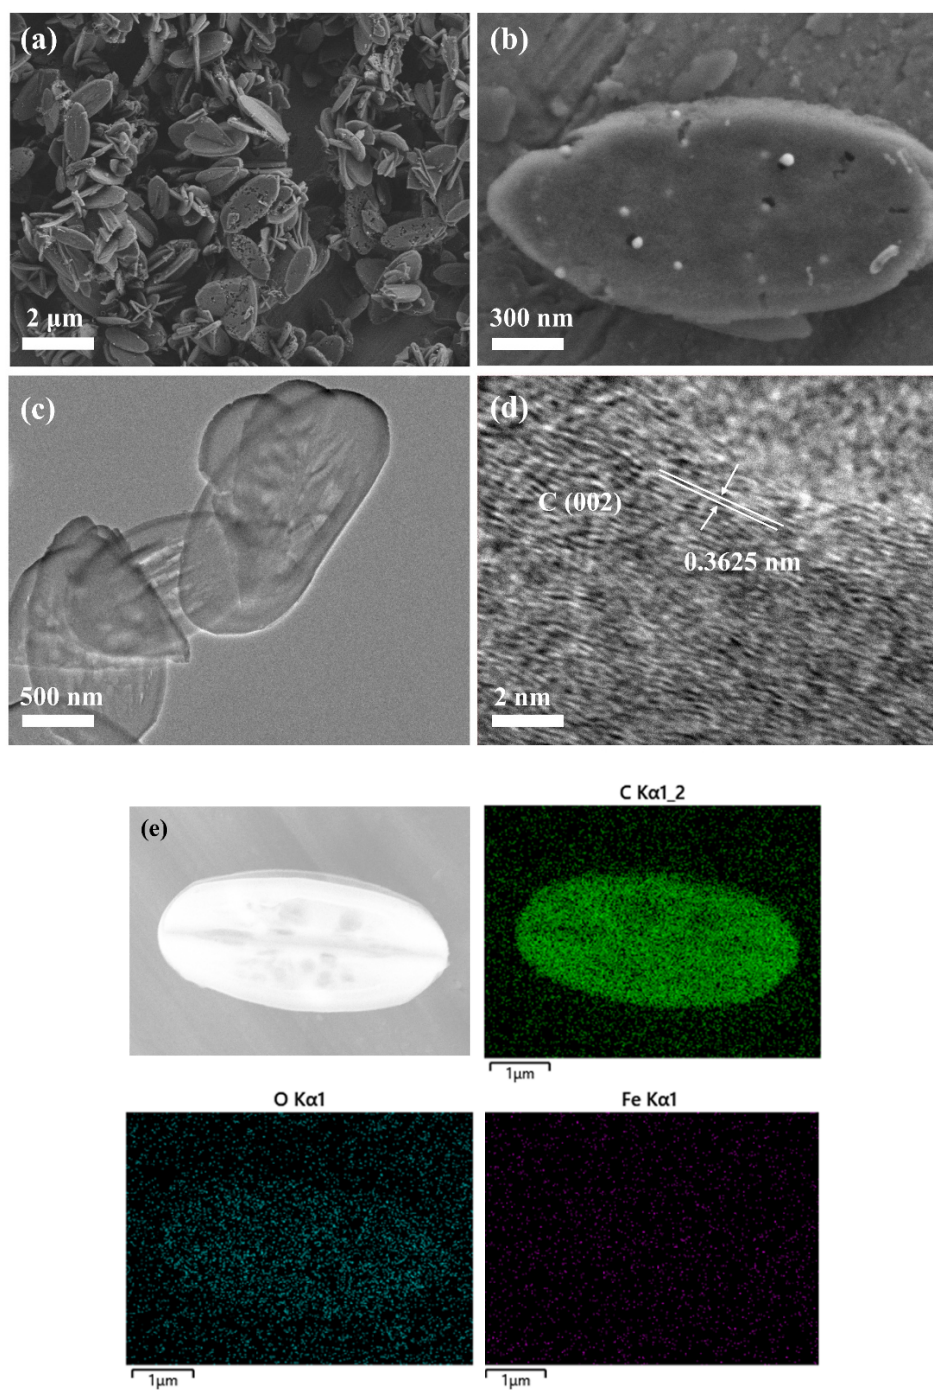

**Figure. S2.** (a) and (b) SEM images of FeN-C. (c) TEM images of FeN-C. (d) HR-TEM images of FeN-C. (e) EDS images of FeN-C

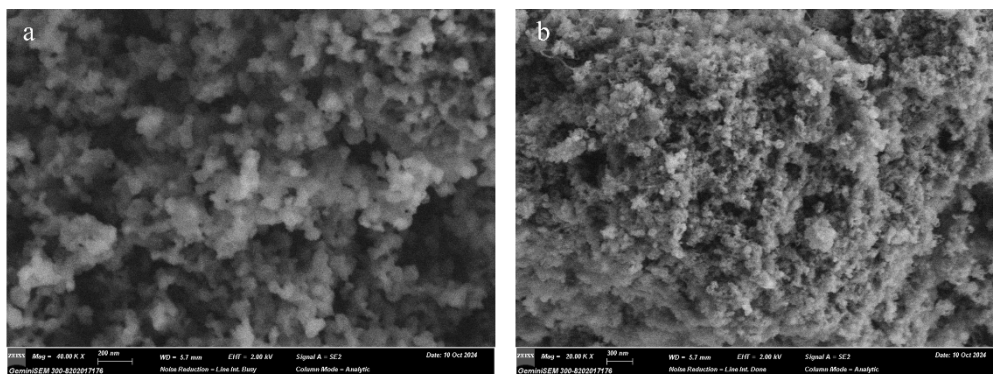

**Figure. S3.** (a) SEM images of FeN<sub>h</sub>cC-0.5. (b) SEM images of FeN<sub>h</sub>cC-2.

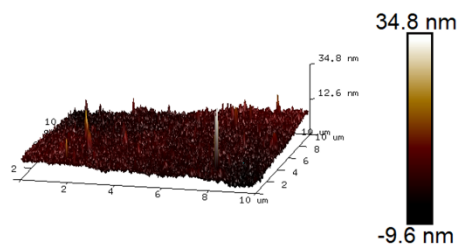

**Figure. S4.** Atomic Force Microscopy (AFM) image of FeN<sub>-hc</sub>C-1 Catalyst surface.

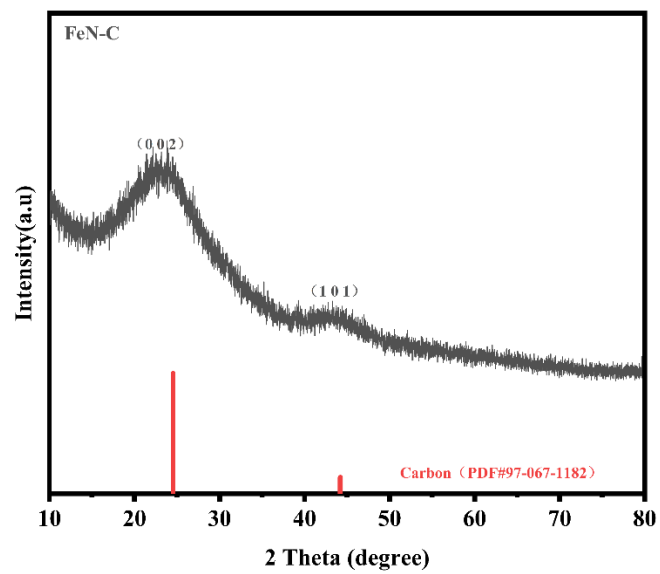

Figure. S5. XRD patterns of FeN-C.



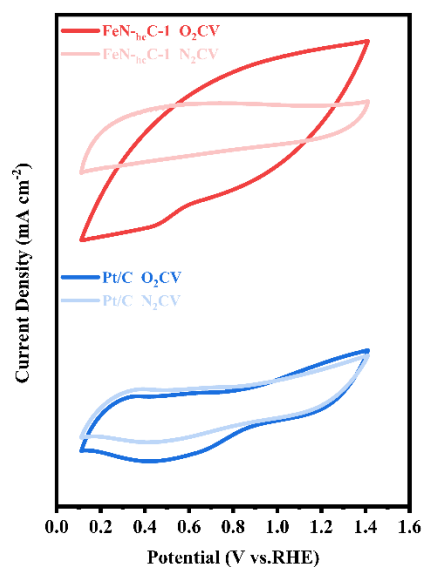

**Figure. S6.** CV curve of FeN<sub>hc</sub>C-1 and Pt/C under neutral condition.

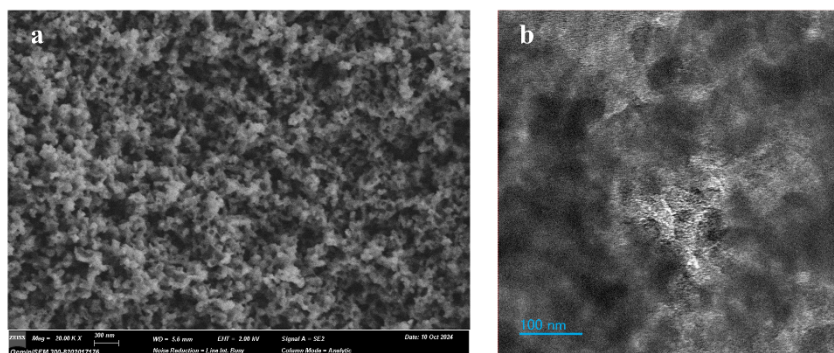

**Figure. S7.** (a) SEM image of FeN<sub>hc</sub>C-1 catalyst after stability test. (b) TEM image of FeN<sub>hc</sub>C-1 catalyst after stability test.

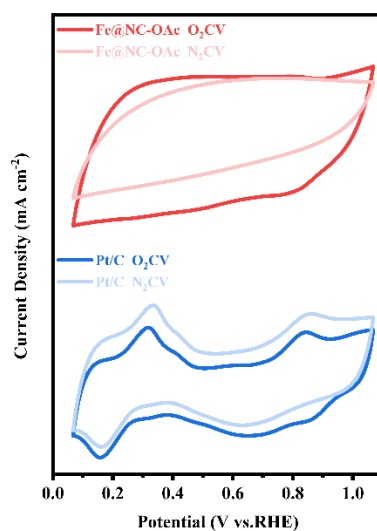

**Figure. S8.** CV curve of FeN<sub>hc</sub>C-1 and Pt/C under alkaline condition.

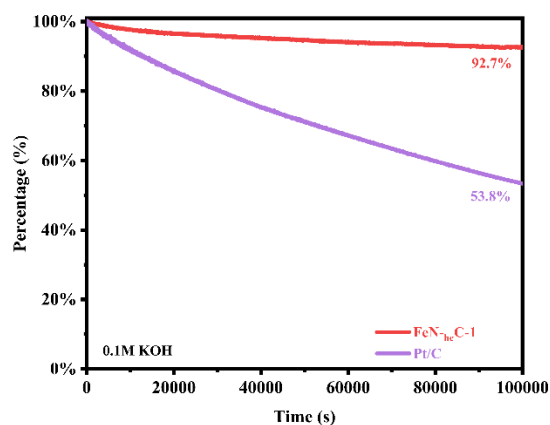

**Figure. S9.** Stability test curves of FeN<sub>hc</sub>C-1 and Pt/C at potential of 0.7V in an alkaline electrolyte.

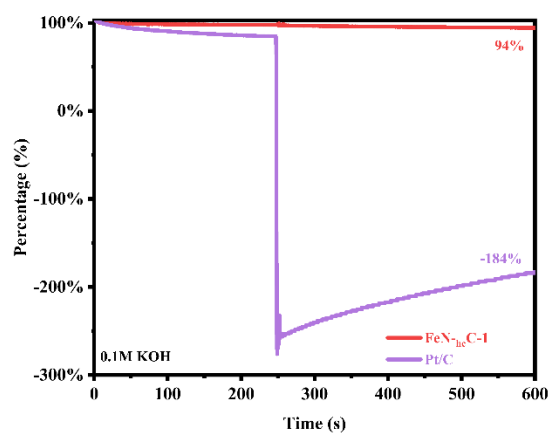

**Figure. S10.** Curves of methanol tolerance test FeN<sub>hc</sub>C-1 and Pt/C in alkaline electrolytes.

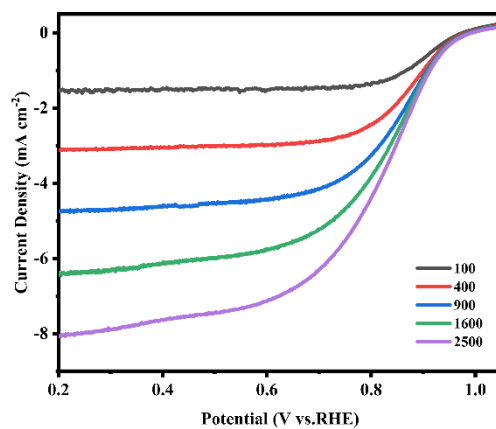

**Figure. S11.** LSV curves of FeN<sub>hc</sub>C-1 in alkaline electrolyte at different rotational speeds.

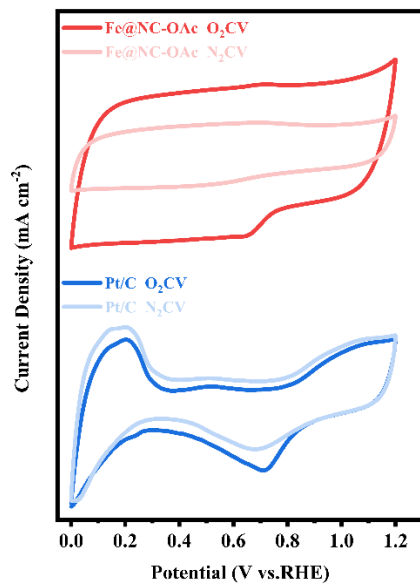

**Figure. S12.** CV curve of FeN<sub>hc</sub>C-1 and Pt/C under acidic condition.

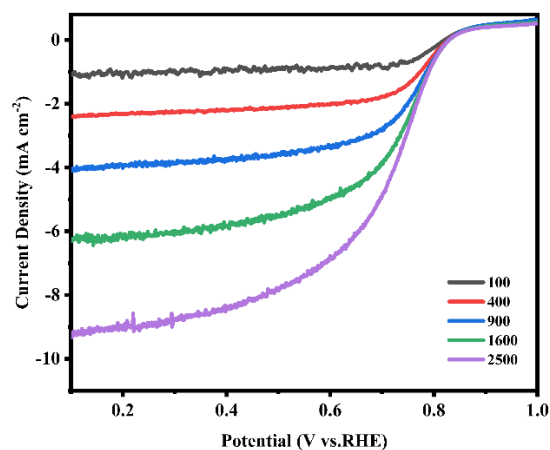

Figure. S13. LSV curves FeN<sub>hc</sub>C-1 in acid electrolyte at different rotational speeds.

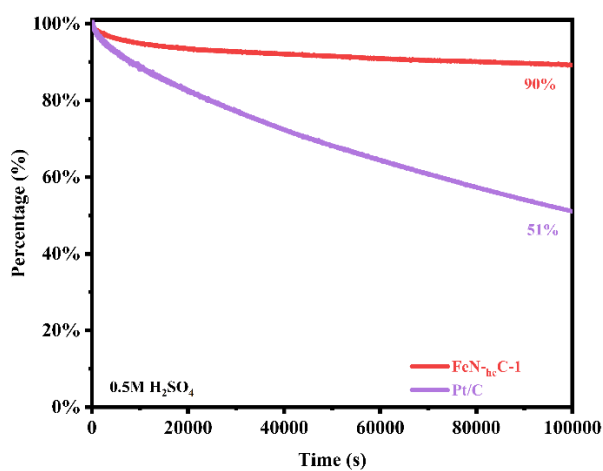

Figure. S14. Stability test curves of FeN<sub>hc</sub>C-1 and Pt/C at potential of 0.7V in an acid electrolyte.

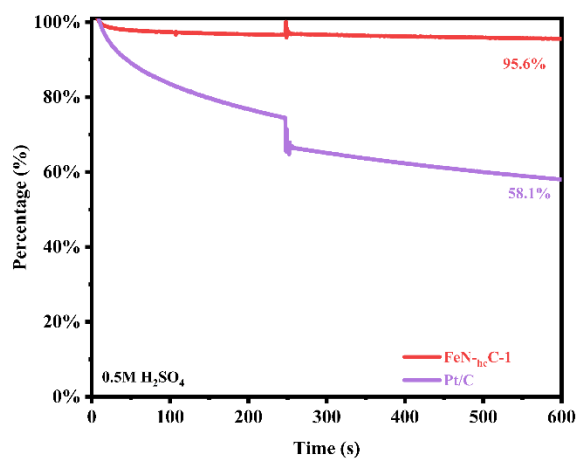

Figure. S15. Curves of methanol tolerance test FeN<sub>hc</sub>C-1 and Pt/C in acid electrolytes.

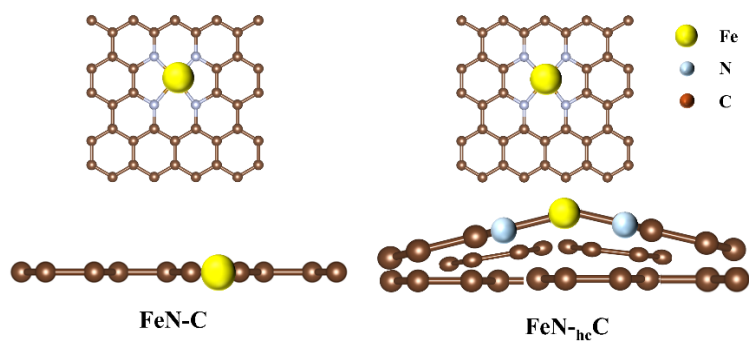

**Figure S16.** models of FeN-C and FeN<sub>-hc</sub>C.

**Table S1.** The results of ICP-MS test showed the Fe content in FeN<sub>hc</sub>C-1 and FeN-C.

| Sample name           | Test element | Sample element content W (%) |
|-----------------------|--------------|------------------------------|
| FeN <sub>hc</sub> C-1 | Fe           | 1.815%                       |
| FeN-C                 | Fe           | 1.078%                       |

**Table S2.** The XPS test results showed the Fe content on the surface of FeN<sub>hc</sub>C-1 and FeN-C catalysts.

| Sample name           | Test element | Sample element content W (%) |
|-----------------------|--------------|------------------------------|
| FeN <sub>hc</sub> C-1 | Fe           | 0.53%                        |
| FeN-C                 | Fe           | 0.34%                        |

**Table S3.** The XPS test results showed the N content on the surface of FeN<sub>hc</sub>C-1 and FeN-C catalysts.

| Sample name           | Test element | Sample element content W (%) |
|-----------------------|--------------|------------------------------|
| FeN <sub>hc</sub> C-1 | N            | 7.33%                        |
| FeN-C                 | N            | 5.56%                        |

**Table S4.** Comparison with recently reported catalysts under alkaline conditions.

| <b>catalyst</b>                    | <b>E<sub>1/2</sub></b> | <b>reference</b> |
|------------------------------------|------------------------|------------------|
| FeN <sub>-hc</sub> C-1 (This work) | 0.89V                  | /                |
| Fe-N <sub>4</sub> S <sub>1</sub>   | 0.88V                  | 1                |
| Fe-N-C-300                         | 0.81V                  | 2                |
| Fe-NC-Gs                           | 0.85V                  | 3                |
| Fe-NPC                             | 0.872V                 | 4                |
| FeCoNi/NC                          | 0.84V                  | 5                |

**Table S5.** Comparison with recently reported catalysts under acidic conditions.

| <b>catalyst</b>                       | <b>E<sub>1/2</sub></b> | <b>reference</b> |
|---------------------------------------|------------------------|------------------|
| FeN <sub>-hc</sub> C-1 (This work)    | 0.77V                  | /                |
| Nb <sub>10</sub> Fe <sub>x</sub> /Z8C | 0.75V                  | 6                |
| FeCr-N-C                              | 0.73V                  | 7                |
| Co@N-C-700                            | 0.65V                  | 8                |
| CoSA-C <sub>2</sub> N                 | 0.74V                  | 9                |
| L FeMn                                | 0.76V                  | 10               |

## reference

1. Y. Zhang, C. Li, J. Li, X. Liu, G. Li, B. Li and L. Wang, *J. Mater. Chem. A*, 2023, **11**, 11326-11333.
2. S. Liu, Q. Meyer, Y. Li, T. Zhao, Z. Su, K. Ching and C. Zhao, *Chem. Commun.*, 2022, **58**, 2323-2326.
3. Y. Zhang, P. He, D. Zhuo, J. Zhang, N. Zhang, X. Wang, G. Lin and Z. Kong, *Electron. Mater. Lett.*, 2024, **20**, 95-101.
4. L. Zhang, Z. Shen, X. Lu, X. Jiao and G. He, *Mater. Lett.*, 2023, **341**, 134237.
5. H. Huang, C. Zhang, H. Li, J. Wang, Z. Chen, Y. He, Y. Li, J. Hu, X. Liu, X. Deng and S. Shi, *Catalysis Science & Technology*, 2024, **14**, 2638-2645.
6. J. Luo, Z. Lu, Y. Zhang, D. Wu, D. Dang, N. Yu, Y. Xu, S. Feng, S. Wang, Z. Zhang, Y. Zhao, P. Deng, J. Li, Z. Miao and X. Tian, *Materials Today Nano*, 2024, **25**, 100448.
7. N. Xue, Y. Zhang, C. Wang, X. Xue, D. Ouyang, H. Zhu and J. Yin, *Int. J. Hydrogen Energy*, 2022, **47**, 33979-33987.
8. S. Chen, Q. Xu, H. Sun, L. Ge, D. Huang, Z. Zhang, Y. Qiao, X. Tong and W. Fan, *ACS Appl. Nano Mater.*, 2024, **7**, 15710-15719.
9. W. Xu, Y. Sun, J. Zhou, M. Cao, J. Luo, H. Mao, P. Hu, H. Gu, H. Zhai, H. Shang and Z. Cai, *Nano Res.*, 2023, **16**, 2294-2301.
10. M. Muhyuddin, A. Friedman, F. Poli, E. Petri, H. Honig, F. Basile, A. Fasolini, R. Lorenzi, E. Berretti, M. Bellini, A. Lavacchi, L. Elbaz, C. Santoro and F. Soavi, *J. Power Sources*, 2023, **556**, 232416.
